# Supplementary material for: Long-term safety and efficacy of guanfacine extended release in children and adolescents with ADHD
Source: Springer Nature journal article supplement (doi:10.1007/s00787-018-1113-4), 2018-02-13
Supplement: MOESM1 [file 15462102]

# Supplementary material

## Supplementary Table 1. Treatment-emergent adverse events by weight-adjusted dose (safety population).

|  | **Participants, n (%)** | | | |
| --- | --- | --- | --- | --- |
| **TEAE** | **0.01-0.04 mg/kg**  **(n = 214)** | **0.05-0.08 mg/kg**  **(n = 203)** | **0.09-0.12 mg/kg**  **(n = 124)** | **0.13-0.16 mg/kg**  **(n = 22)** |
| Any TEAE | 85 (39.7) | 115 (56.7) | 77 (62.1) | 14 (63.6) |
| ***TEAEs reported in ≥ 5% of all participants*** | | |  |  |
| Somnolence | 23 (10.7) | 35 (17.2) | 32 (25.8) | 6 (27.3) |
| Headache | 24 (11.2) | 36 (17.7) | 19 (15.3) | 2 (9.1) |
| Fatigue | 13 (6.1) | 20 (9.9) | 17 (13.7) | 1 (4.5) |
| Nasopharyngitis | 8 (3.7) | 14 (6.9) | 7 (5.6) | 1 (4.5) |
| Dizziness | 5 (2.3) | 11 (5.4) | 8 (6.5) | 0 |
| Insomnia | 6 (2.8) | 9 (4.4) | 2 (1.6) | 0 |
| Nausea | 4 (1.9) | 7 (3.4) | 5 (4.0) | 0 |
| Upper respiratory tract infection | 5 (2.3) | 10 (4.9) | 2 (1.6) | 0 |
| Abdominal pain | 1 (0.5) | 8 (3.9) | 4 (3.2) | 0 |
| Vomiting | 5 (2.3) | 6 (3.0) | 4 (3.2) | 0 |
| Rhinitis | 0 | 5 (2.5) | 5 (4.0) | 1 (4.5) |
| Oropharyngeal pain | 3 (1.4) | 7 (3.4) | 2 (1.6) | 0 |

TEAE, treatment-emergent adverse event

## Supplementary Table 2. Potentially clinically important vital signs and electrocardiogram parameters.

|  | **Baseline** | **Final assessment** | **Taper** | **Overall on-therapy**a | **Off-treatment follow-up** |
| --- | --- | --- | --- | --- | --- |
| **Supine pulse rate** |  |  |  |  |  |
| ≤ 50 bpm | 1/214 (0.5) | 3/212 (1.4) | 0/155 | 28/212 (13.2) | 1/185 (0.5) |
| ≥ 100 bpm | 7/214 (3.3) | 0/212 | 1/155 (0.6) | 14/212 (6.6) | 9/185 (4.9) |
| **Supine SBP** |  |  |  |  |  |
| ***Children***b |  |  |  |  |  |
| < 90 mmHg | 2/131 (1.5) | 2/130 (1.5) | 3/97 (3.1) | 29/130 (22.3) | 2/111 (1.8) |
| > 120 mmHg | 4/131 (3.1) | 2/130 (1.5) | 2/97 (2.1) | 20/130 (15.4) | 4/111 (3.6) |
| ***Adolescents***b |  |  |  |  |  |
| < 100 mmHg | 3/83 (3.6) | 5/82 (6.1) | 1/58 (1.7) | 26/82 (31.7) | 0/74 |
| > 140 mmHg | 1/83 (1.2) | 1/82 (1.2) | 0/58 | 3/82 (3.7) | 1/74 (1.4) |
| **Supine DBP** |  |  |  |  |  |
| ***Children***b |  |  |  |  |  |
| < 50 mmHg | 6/131 (4.6) | 3/130 (2.3) | 0/97 | 24/130 (18.5) | 2/111 (1.8) |
| > 80 mmHg | 0/131 | 0/130 | 2/97 (2.1) | 7/130 (5.4) | 0/111 |
| ***Adolescents***b |  |  |  |  |  |
| < 60 mmHg | 16/83 (19.3) | 11/82 (13.4) | 3/58 (5.2) | 43/82 (52.4) | 2/74 (2.7) |
| > 90 mmHg | 0/83 | 0/82 | 0/58 | 0/82 | 1/74 (1.4) |
| **QTcF** |  |  |  |  |  |
| ≥ 500 milliseconds | 0/214 | 0/204 | NA | 0/204 | 0/170 |

All data are shown as n/N (%), with N being the number of participants with a valid measurement at that visit.

aOverall on-therapy includes all measurements taken while receiving the investigational product, including during tapering.

bBlood pressure results are based on age at assessment, categorized as children (aged 6–12 years) or adolescents (aged ≥ 13 years).

DBP, diastolic blood pressure; NA, assessed; QTcF, QT interval corrected using Fridericia’s formula; SBP, systolic blood pressure.

**Supplementary Table 3. Potentially clinically important vital sign results by weight-adjusted dose (safety population).**

| **Vital sign** | **Participants, n (%)** | | | |
| --- | --- | --- | --- | --- |
| PCI criteria | **0.01-0.04mg/kg**  **(n = 214)** | **0.05-0.08mg/kg**  **(n = 203)** | **0.09-0.12mg/kg**  **(n = 124)** | **0.13-0.16mg/kg**  **(n = 22)** |
| **Supine pulse** |  |  |  |  |
| ≤ 50 bpm | 6 (2.8) | 16 (7.9) | 10 (8.4) | 1 (4.8) |
| ≥ 100 bpm | 5 (2.4) | 8 (4.0) | 4 (3.4) | 0 |
| **Supine SBP** |  |  |  |  |
| *Children*a |  |  |  |  |
| < 90 mmHg | 6 (2.8) | 19 (9.4) | 15 (12.6) | 3 (14.3) |
| > 120 mmHg | 4 (1.9) | 14 (6.9) | 5 (4.2) | 0 |
| *Adolescents*a |  |  |  |  |
| < 100 mmHg | 14 (6.6) | 31 (15.3) | 7 (5.9) | 0 |
| > 140 mmHg | 0 | 4 (2.0) | 0 | 0 |
| **Supine DBP** |  |  |  |  |
| *Children*a |  |  |  |  |
| < 50 mmHg | 6 (2.8) | 15 (7.4) | 9 (7.6) | 1 (4.8) |
| > 80 mmHg | 4 (1.9) | 1 (0.5) | 2 (1.7) | 0 |
| *Adolescents*a |  |  |  |  |
| < 60 mmHg | 44 (20.8) | 50 (24.8) | 17 (14.3) | 0 |
| > 90 mmHg | 1 (0.5) | 0 | 0 | 0 |
| **QTcF** |  |  |  |  |
| ≥ 500 milliseconds | 0 | 0 | 0 | 0 |

aBlood pressure results are based on age at assessment, categorized as children (aged 6–12 years) or adolescents (aged ≥ 13 years).

DBP, diastolic blood pressure; QTcF, QT interval corrected using Fridericia’s formula; SBP, systolic blood pressure.

## Supplementary Table 4. Shifts in BMI categories (safety population, n = 214).

| **Number of  participants, n, %** | | **BMI category at final assessment** | | | | |
| --- | --- | --- | --- | --- | --- | --- |
| Under-weight | Healthy weight | Overweight | Obese | Total |
| **BMI category at baseline** | Underweight | **0** | 2 (100) | 0 | 0 | 2 |
| Healthy weight | 5 (3.2) | **137 (87.3)** | 14 (8.9) | 1 (0.6) | 157 |
| Overweight | 0 | 12 (26.7) | **23 (51.1)** | 10 (22.2) | 45 |
| Obese | 0 | 0 | 0 | **3 (100)** | 3 |
| Total | 5 (2.4) | 151 (72.9) | 37 (17.9) | 14 (6.8) | **207** |

Data are n (%) of the total for each category.

BMI categories were defined as follows: underweight, < 5th percentile; healthy weight, ≥ 5th to < 85th percentiles; overweight, ≥ 85th to < 95th percentiles; obese, ≥ 95th percentile. BMI categories used age at assessment and were based on age- and sex-adjusted percentiles according to the 2000 Centers for Disease Control and Prevention percentile growth charts for children and adolescents aged 2–20 years. Final assessment was defined as the last valid post-baseline value before dose taper.
BMI, body mass index.

## Supplementary Figure 1. Study design.


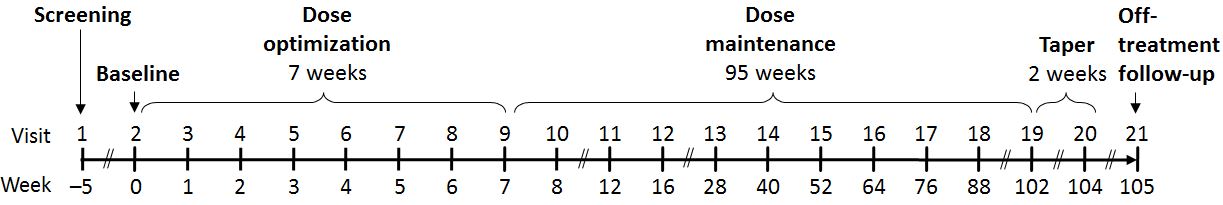


During dose optimization, GXR treatment was initiated at 1 mg/day and, in the absence of significant safety issues, could be increased weekly by 1 mg/day increments, or lowered at any point, up to the maximum permitted dose according to age and body weight.
The duration of the dose-optimization period was up to up to 7 weeks. Visits 7, 8 and/or 9 (at weeks 5, 6 and/or 7) were optional for participants who had reached their optimal dose by visits 6–8 (weeks 4–6). The dose-maintenance period started at visit 10 (week 8). The last efficacy evaluation was at visit 19 (week 102) or at early termination. The last safety evaluation was 7 days after the final dose of GXR (visit 21, week 105).

BL, baseline; GXR, guanfacine extended release.

## Supplementary Figure 2. (a) Mean ADHD-RS-IV total scores and (b) proportion of participants with CGI-S scores of 1 or 2a(full analysis set, n = 209).


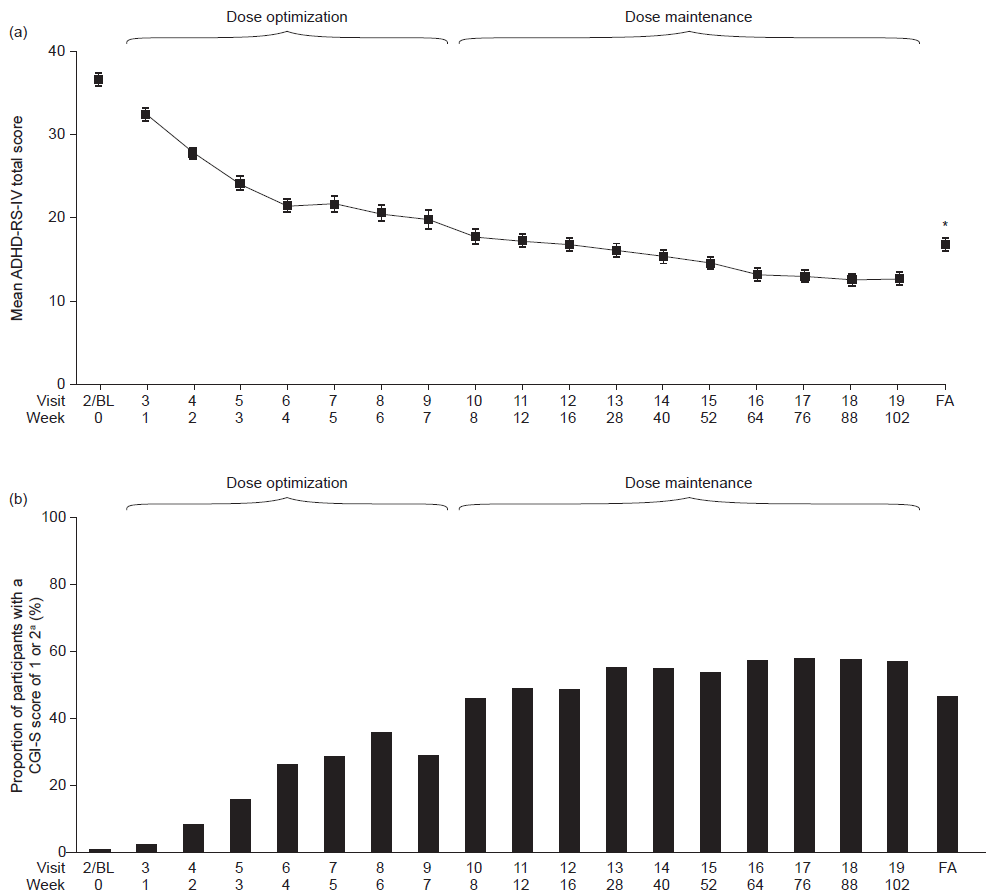


**p* < 0.0001 versus baseline (nominal *p* value from a one-sample *t*-test, with no adjustment for multiple testing).

Error bars show standard error of the mean.
aPatients with a CGI-S score of 1 or 2 are considered to be normal or borderline mentally ill.

ADHD-RS-IV, Attention-Deficit/Hyperactivity Disorder Rating Scale IV; BL, baseline; CGI-S, Clinical Global Impressions-Severity of Illness; FA, final assessment.
